# Supplementary material
Source: bioRxiv or medRxiv preprint supplement (https://www.biorxiv.org/highwire/filestream/25686/field_highwire_adjunct_files/13/077701-3.pdf)

**A****TIGHT JUNCTION**  
(FDR 1.65e-12 %)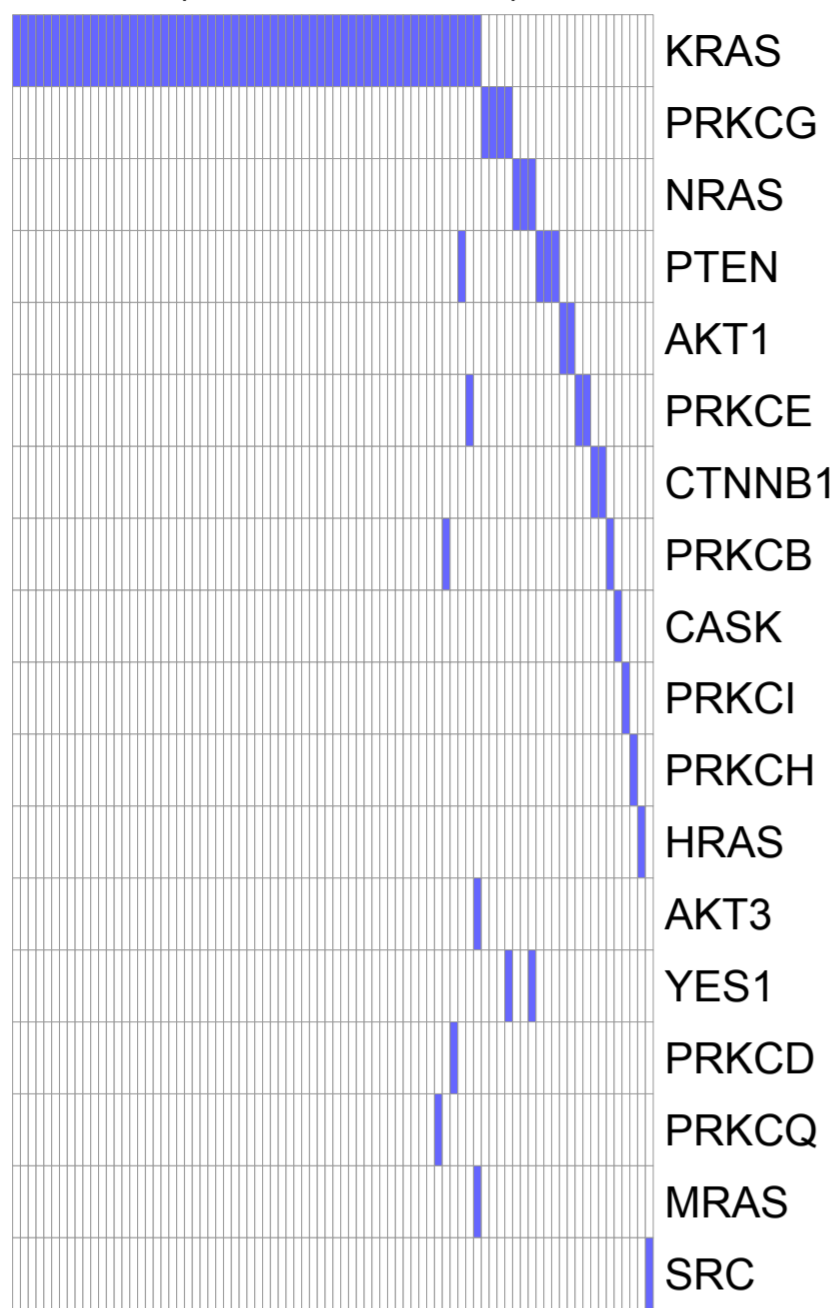**B**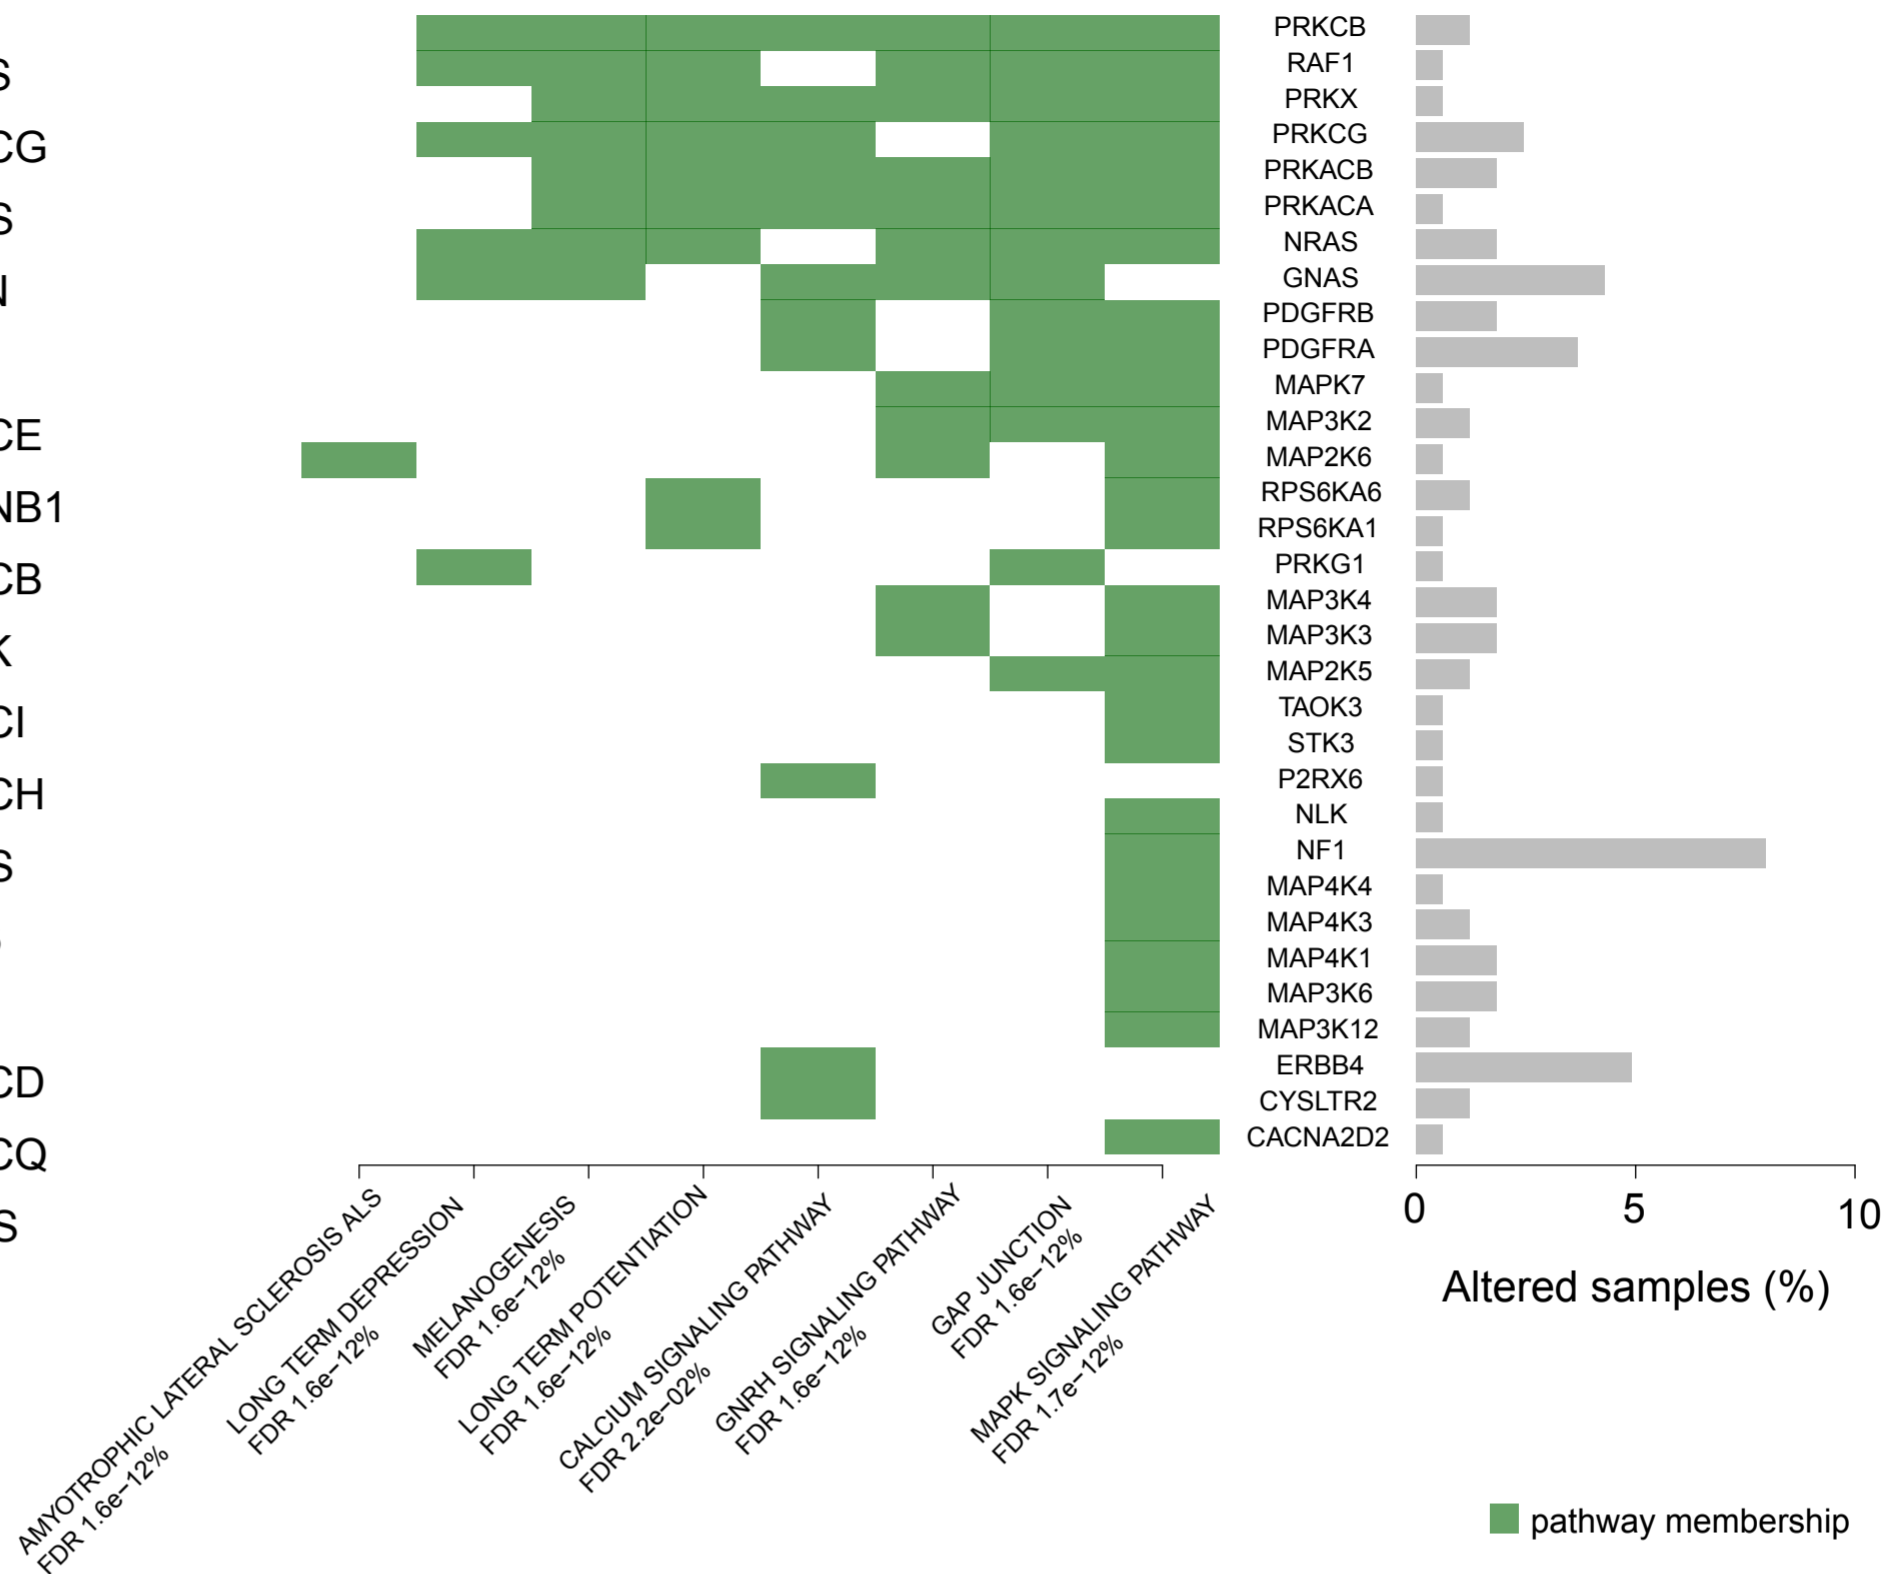**C****Smoking status:**

Current Smoker

Never Smoked

SL Enriched Pathways

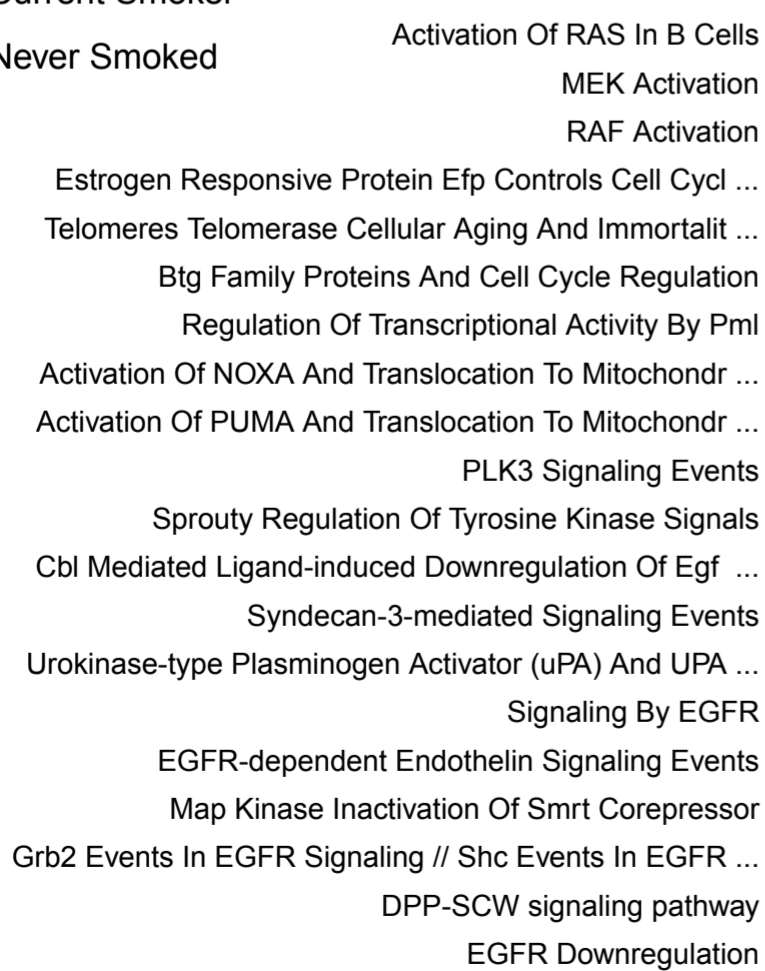

wild-type altered

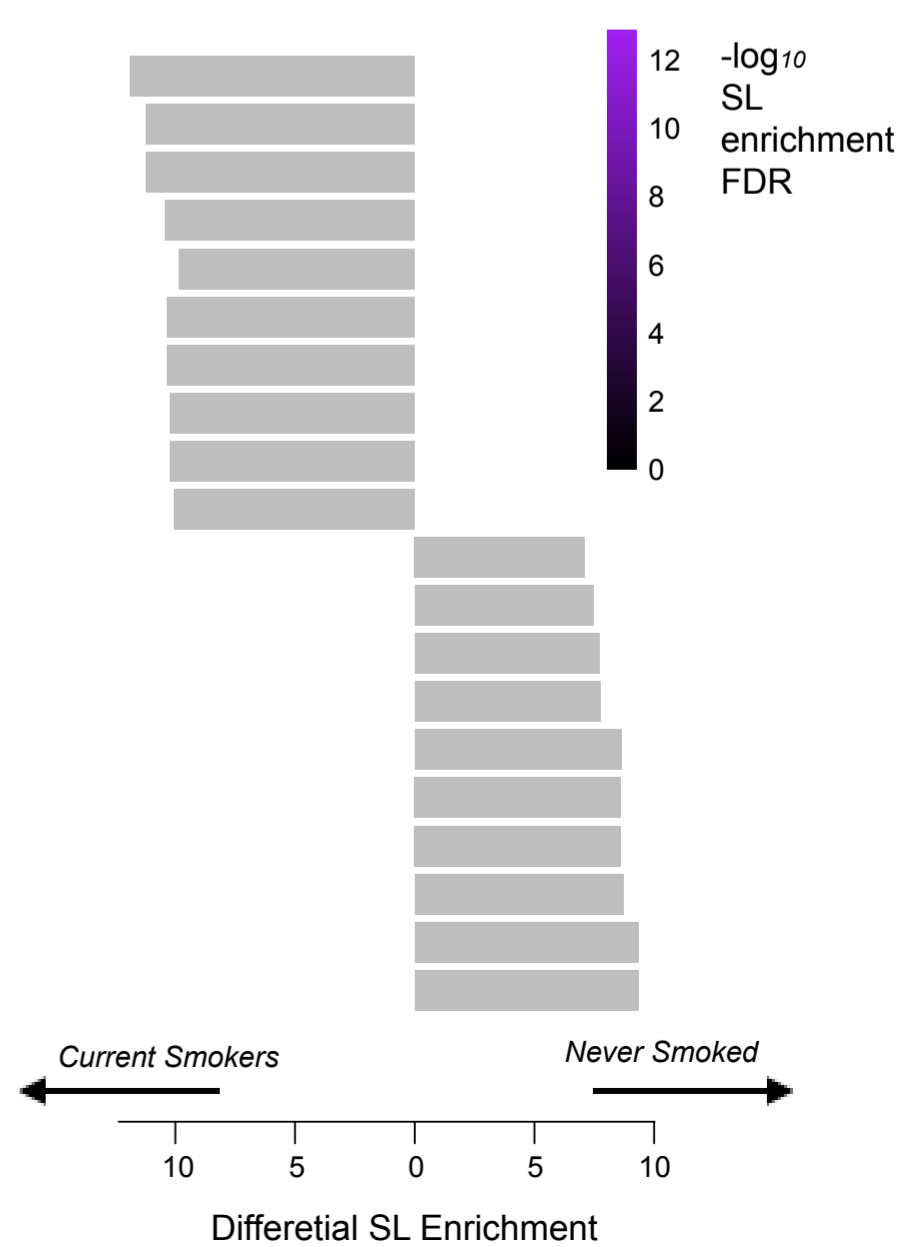

Supplement: Supplementary file [file 077701-3.pdf]
